# Supplementary material
Source: PubMed Central journal article supplement (PMC6190673)
Supplement: NIHMS1505980-supplement-Sup_1.pdf [file NIHMS1505980-supplement-Sup_1.pdf]

## Supporting Information

### Measurements of Parameters Controlling the Emissions of Organophosphate Flame Retardants in Indoor Environments

Yirui Liang<sup>†</sup>, Xiaoyu Liu<sup>\*‡</sup>, Matthew R. Allen<sup>§</sup>

<sup>†</sup> Oak Ridge Institute for Science and Education participant at U.S. Environmental Protection Agency, 1299 Bethel Valley Road, Oak Ridge, TN 37830, United States

<sup>‡</sup> Office of Research and Development, National Risk Management Research Laboratory, U.S. Environmental Protection Agency, Research Triangle Park, North Carolina 27711, United States

<sup>§</sup> Jacobs Technology Inc. 600 William Northern Boulevard, Tullahoma, Tennessee 37388, United States

#### **\*Corresponding Author:**

Phone: 1-919-541-2459

Fax: 1-919-541-0359

Email: liu.xiaoyu@epa.gov

Number of pages: 10

Number of figures: 4

Number of tables: 6

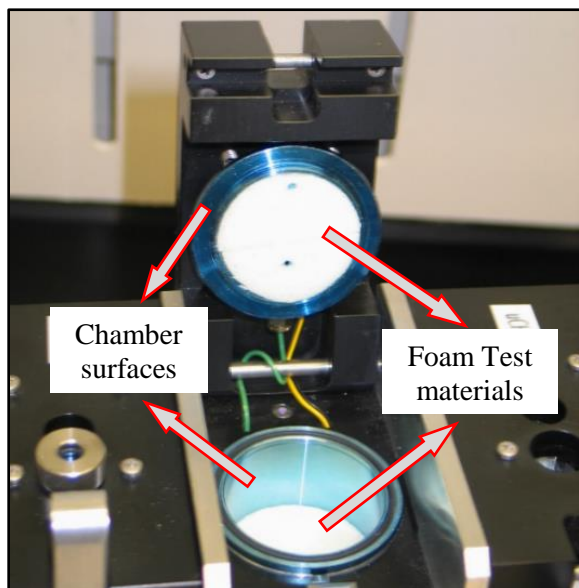

a)

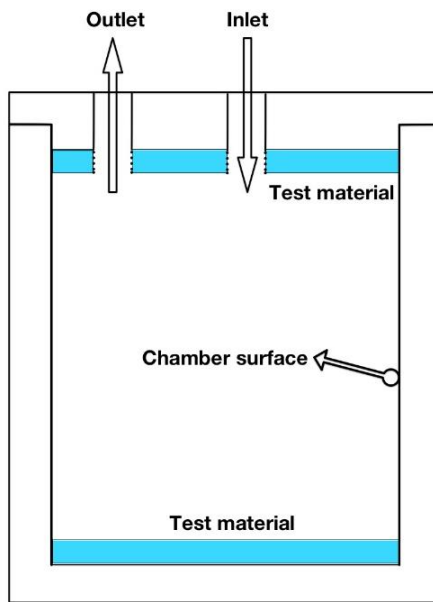

b)

Figure S1. a) A microchamber with source materials and b) Schematic diagram of the M-A-M microchamber.

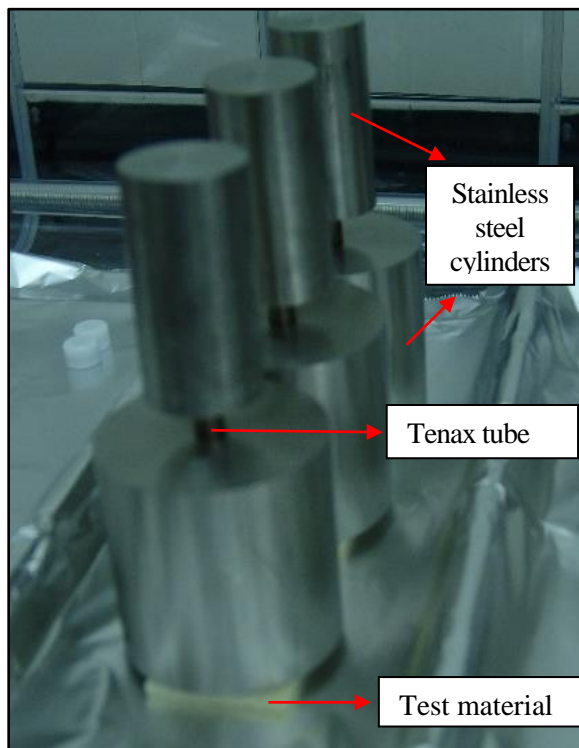

a)

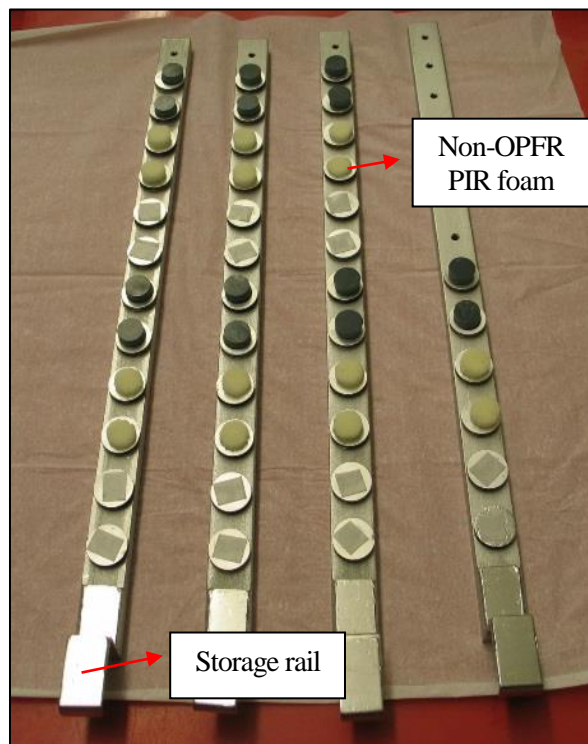

b)

Figure S2. a) Diffusive tube sampling test (from bottom to top: position 1, position 2, and position 3) and b) Materials for small chamber sorption test on storage rail.

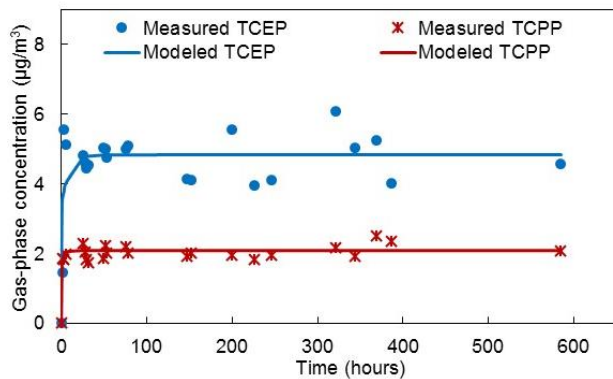

Figure S3. Measured gas-phase OPFR concentrations in the M-A-M microchamber with model fitting in chamber 2.

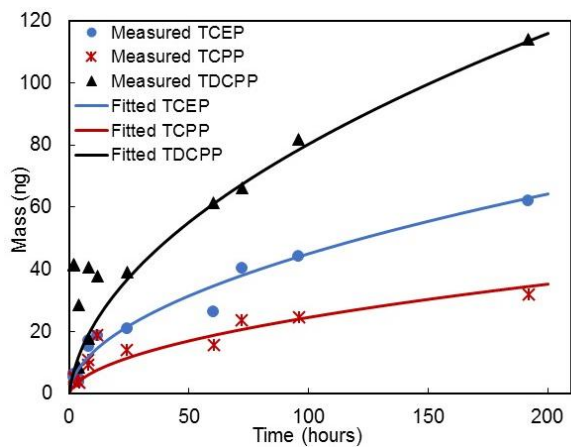

a)

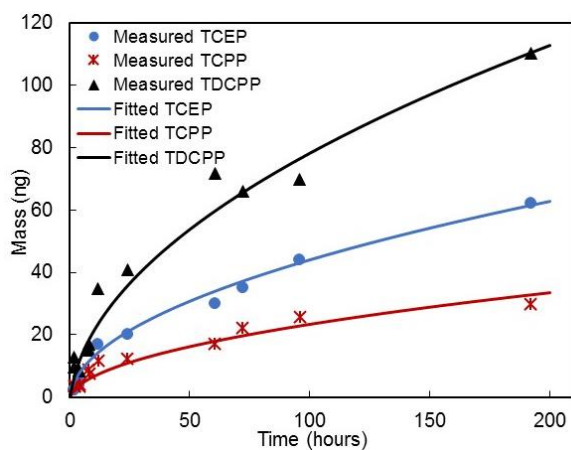

b)

Figure S4. The mass accumulation of TCEP, TCPP and TDCPP from diffusive sampling test with model fitting. a) Position 2, b) Position 3.

Table S1. Methods of Markes TD100 Agilent 6890/5973 GC/MS for OPFRs analysis

|                        |                          |             |
|------------------------|--------------------------|-------------|
| Operating Mode         | Standard Two Stage       |             |
|                        | Flow Path Temp           | 180 °C      |
|                        | Min Carrier Pressure     | 8.0 psi     |
|                        | GC Cycle Time            | 19.0 min    |
| Standby Mode           | Split                    | On          |
|                        | Split Flow               | 20.0 mL/min |
| Pre-desorption         | Purge Settings           |             |
|                        | Inject Std               | 1.0 min     |
|                        | IS Flow                  | 40.0 mL/min |
|                        | Loop Fill Time           | 1.0 min     |
|                        | Prepurge Time            | 0.1 min     |
|                        | Split On                 | 20.0 mL/min |
| Tube/Sample Desorption | Desorption Time          | 8.0 min     |
|                        | Desorption Temp          | 300 °C      |
|                        | Trap Flow                | 50.0 mL/min |
|                        | Split                    | On          |
|                        | Inlet Split Ratio        | 2.4:1       |
| Trap Settings          | Trap Desorption Settings |             |
|                        | Pre Trap Fire Purge      | 1.0 min     |
|                        | Trap Flow                | 35.0 mL/min |
|                        | Split Flow               | 34.0 mL/min |
|                        | Outlet Split Ratio       | 35.0:1      |
|                        | Total Split Ratio        | 85.0:1      |
|                        | Trap Low Temp            | 25 °C       |
|                        | Heating Rate             | MAX °C/min  |
|                        | Trap High Temp           | 310 °C      |
|                        | Trap Hold Time           | 3.0 min     |

Table S2. Methods of Agilent 6890/5973 GC/MS for tris organophosphorus flame retardants.

| Parameters                | Settings                                                                                                                                                                                                 |
|---------------------------|----------------------------------------------------------------------------------------------------------------------------------------------------------------------------------------------------------|
| Method run time           | 12.5 minutes                                                                                                                                                                                             |
| Column model              | Restek Rxi-5 Sil MS                                                                                                                                                                                      |
| Column dimensions         | 30 m x 0.25 mm 0.25 µm                                                                                                                                                                                   |
| Carrier gas               | Helium                                                                                                                                                                                                   |
| Flow rate                 | 1.0 mL/min                                                                                                                                                                                               |
| Oven temperature gradient | 80 °C hold for 0.5 min; 20 °C/min to 300 °C for 1 min; post run 325 °C for 8 min                                                                                                                         |
| Injector type             | Agilent split/splitless                                                                                                                                                                                  |
| Inlet mode                | Pulsed Splitless                                                                                                                                                                                         |
| MSD interface             | 280 °C                                                                                                                                                                                                   |
| Source temperature        | 230 °C                                                                                                                                                                                                   |
| MS Quad temperature       | 180 °C                                                                                                                                                                                                   |
| Acquisition mode          | SIM                                                                                                                                                                                                      |
| Solvent delay             | 6.50 min                                                                                                                                                                                                 |
| Inlet temperature         | 250 °C; pulsed pressure 30 psi for 2.1 min; purge time 2 min; purge flow 35 mL/min.                                                                                                                      |
| SIM Parameters            | 6.50 – 7.59 min, 103 m/z (TBP-L) <sup>1</sup> ; 7.60 – 9.49 min, 249 m/z (TCEP) <sup>2</sup> , 277 m/z (TCPP) <sup>3</sup> ; 9.5 – 12.5 min, 381 m/z (TDCPP) <sup>4</sup> , 341 m/z (TPP-L) <sup>5</sup> |

1. d<sub>27</sub> - tributyl phosphate, internal standard.

2. tris(2-chloroethyl) phosphate.

3. tris(1-chloro-2-propyl) phosphate.

4. tris(1,3-dichloro-2-propyl) phosphate.

5. d<sub>15</sub>-triphenyl phosphate, recovery check standard.

Table S3. Quantification ranges of OPFRs for the tests in this study.

| Tests                            | Unit  | TCEP     | TCPP     | TDCPP    |
|----------------------------------|-------|----------|----------|----------|
| Micro chamber emission test      | ng/mL | 5 - 202  | 5 - 204  | 5 - 202  |
| Diffusive sampling test          | ng    | 10 - 250 | 10 - 600 | 10 - 200 |
| Dual small chamber sorption test | ng/mL | 5 - 202  | 5 - 204  | 5 - 202  |

Table S4. Parameters used for model fitting for the M-A-M microchamber emission test, the diffusive sampling test, and the dual small chamber sorption test.

| Tests                            | Parameters at 23°C                                                                     |                       | TCEP                  | TCPP                  | TDCPP                 |
|----------------------------------|----------------------------------------------------------------------------------------|-----------------------|-----------------------|-----------------------|-----------------------|
| Microchamber emission test       | Chamber volume (V) <sup>1</sup>                                                        | m <sup>3</sup>        |                       | 4.4×10 <sup>-5</sup>  |                       |
|                                  | Ventilation rate (Q) <sup>1</sup>                                                      | m <sup>3</sup> /h     |                       | 1.2×10 <sup>-2</sup>  |                       |
|                                  | Air change rate (ACH) <sup>1</sup>                                                     | h <sup>-1</sup>       |                       | 273                   |                       |
|                                  | Average air velocity in chamber <sup>2</sup>                                           | m/s                   |                       | 0.09                  |                       |
|                                  | Emission surface area (A <sub>0</sub> ) <sup>1</sup>                                   | m <sup>2</sup>        |                       | 3.2×10 <sup>-3</sup>  |                       |
|                                  | Chamber surface area (A <sub>s</sub> ) <sup>1</sup>                                    | m <sup>2</sup>        |                       | 3.5 ×10 <sup>-3</sup> |                       |
|                                  | Material-phase concentration in foam (C <sub>0</sub> ) <sup>1</sup>                    | µg/m <sup>3</sup>     | 9.04×10 <sup>8</sup>  | 5.33×10 <sup>8</sup>  | 3.09×10 <sup>9</sup>  |
|                                  | Steady state gas-phase concentration in chamber 1 (y <sub>ss</sub> ±%RSD) <sup>1</sup> | µg/m <sup>3</sup>     | 5.02 ±10.66           | 2.02 ±13.64           | N/A                   |
|                                  | Steady state gas-phase concentration in chamber 2 (y <sub>ss</sub> ±%RSD) <sup>1</sup> | µg/m <sup>3</sup>     | 4.65 ±10.4            | 2.07 ± 10.46          | N/A                   |
|                                  | Mass transfer coefficient (h <sub>m</sub> , h <sub>s</sub> ) <sup>3</sup>              | m/h                   | 4.92                  | 4.55                  | 4.28                  |
| Diffusive sampling test          | Chamber surface/air partition coefficient (K <sub>sa</sub> ) <sup>4</sup>              | m                     | 29.40                 | 6.20                  | N/A                   |
|                                  | Tenax tube internal diameter <sup>1</sup>                                              | m                     |                       | 0.005                 |                       |
|                                  | Thickness of washer <sup>1</sup>                                                       | m                     |                       | 1.40×10 <sup>-4</sup> |                       |
|                                  | Diffusive length <sup>5</sup>                                                          | m                     |                       | 0.014                 |                       |
|                                  | Diffusivity in air <sup>6</sup>                                                        | m <sup>2</sup> /s     | 5.37×10 <sup>-6</sup> | 4.77×10 <sup>-6</sup> | 4.35×10 <sup>-6</sup> |
|                                  | Chamber volume (V) <sup>1</sup>                                                        | m <sup>3</sup>        |                       | 0.053                 |                       |
| Dual small chamber sorption test | Ventilation rate (Q) <sup>1</sup>                                                      | m <sup>3</sup> /h     |                       | 5.56×10 <sup>-2</sup> |                       |
|                                  | Air change rate (ACH) <sup>1</sup>                                                     | h <sup>-1</sup>       |                       | 1.05                  |                       |
|                                  | Average air velocity in chamber <sup>2</sup>                                           | m/s                   |                       | 0.17                  |                       |
|                                  | Material surface area <sup>1</sup>                                                     | m <sup>2</sup>        |                       | 5.62×10 <sup>-4</sup> |                       |
|                                  | Thickness of material <sup>1</sup>                                                     | m                     |                       | 3.97×10 <sup>-3</sup> |                       |
|                                  | Inlet gas-phase concentration <sup>1</sup>                                             | µg/m <sup>3</sup>     | 1.11                  | 5.00                  | 0.16                  |
| Molecular weight                 | g/mol                                                                                  | 285.5                 | 327.6                 | 430.9                 |                       |
| Vapor pressure <sup>7</sup>      | torr                                                                                   | 8.55×10 <sup>-6</sup> | 1.05×10 <sup>-5</sup> | 4.20×10 <sup>-8</sup> |                       |

1. Measured in the test.
2. Air velocity measured following the method in ref 1.
3. Calculated with the measured air velocity in microchamber using program PARAMS.<sup>2</sup> h<sub>m</sub> and h<sub>s</sub> in Equation 3 have the same value because of the same measured air velocity in microchamber.
4. Obtained from ref 1.
5. Obtained from ref 3.
6. Estimated using program PARAMS.<sup>2</sup>
7. Obtained from ref 4.

Table S5. Calculated  $Bi_m/K_{ma}$  and  $Fo_m$  values of SVOCs for different materials.

| Material                          | Chemical | $D_m$ (m <sup>2</sup> /h) | $K_{ma}$ | $h_m$ (m/h) <sup>5</sup> | L (mm) | $Bi_m/K_{ma}$ | $Fo_m$ <sup>6</sup> |
|-----------------------------------|----------|---------------------------|----------|--------------------------|--------|---------------|---------------------|
| PIR foam <sup>1</sup>             | TCEP     | 2.01E-10                  | 7.76E+06 | 1.35                     | 3.97   | 3.43          | 7.67E-03            |
|                                   | T CPP    | 8.25E-11                  | 6.85E+06 | 1.25                     | 3.97   | 8.78          | 3.14E-03            |
|                                   | TDCPP    | 1.39E-11                  | 1.90E+08 | 1.18                     | 3.97   | 1.77          | 5.28E-04            |
| Plastic sheet <sup>1</sup>        | TCEP     | 4.98E-11                  | 2.00E+07 | 1.35                     | 0.1    | 0.14          | 2.99E+00            |
|                                   | T CPP    | 2.04E-11                  | 1.91E+07 | 1.25                     | 0.1    | 0.32          | 1.22E+00            |
|                                   | TDCPP    | 3.43E-12                  | 6.31E+07 | 1.18                     | 0.1    | 0.54          | 2.06E-01            |
| Vinyl flooring <sup>1</sup>       | TCEP     | 8.81E-12                  | 4.74E+08 | 1.35                     | 4.62   | 1.50          | 2.48E-04            |
|                                   | T CPP    | 3.61E-12                  | 4.34E+08 | 1.25                     | 4.62   | 3.69          | 1.01E-04            |
|                                   | TDCPP    | 6.07E-13                  | 4.62E+09 | 1.18                     | 4.62   | 1.93          | 1.71E-05            |
| Painted gypsum board <sup>2</sup> | TCEP     | 5.83E-09                  | 3.85E+06 | 1.35                     | 1.6    | 0.10          | 1.37E+00            |
|                                   | T CPP    | 2.39E-09                  | 3.74E+06 | 1.25                     | 1.6    | 0.22          | 5.60E-01            |
|                                   | TDCPP    | 4.02E-10                  | 8.03E+06 | 1.18                     | 1.6    | 0.58          | 9.42E-02            |
| Concrete <sup>2</sup>             | TCEP     | 9.03E-10                  | 5.67E+06 | 1.35                     | 6.3    | 1.66          | 1.37E-02            |
|                                   | T CPP    | 3.70E-10                  | 5.39E+06 | 1.25                     | 6.3    | 3.95          | 5.59E-03            |
|                                   | TDCPP    | 6.22E-11                  | 2.11E+07 | 1.18                     | 6.3    | 5.64          | 9.40E-04            |
| Ceiling tile <sup>2</sup>         | TCEP     | 2.94E-11                  | 4.77E+07 | 1.35                     | 1.1    | 1.06          | 1.46E-02            |
|                                   | T CPP    | 1.20E-11                  | 4.10E+07 | 1.25                     | 1.1    | 2.79          | 5.95E-03            |
|                                   | TDCPP    | 2.02E-12                  | 3.99E+08 | 1.18                     | 1.1    | 1.60          | 1.00E-03            |
| Vinyl flooring-A <sup>2</sup>     | TCEP     | 1.15E-11                  | 2.09E+07 | 1.35                     | 0.2    | 1.13          | 1.73E-01            |
|                                   | T CPP    | 4.73E-12                  | 1.89E+07 | 1.25                     | 0.2    | 2.80          | 7.10E-02            |
|                                   | TDCPP    | 7.95E-13                  | 2.53E+08 | 1.18                     | 0.2    | 1.17          | 1.19E-02            |
| Mattress pad liner <sup>2</sup>   | TCEP     | 5.73E-12                  | 2.08E+07 | 1.35                     | 0.2    | 2.27          | 8.60E-02            |
|                                   | T CPP    | 2.35E-12                  | 1.96E+07 | 1.25                     | 0.2    | 5.43          | 3.53E-02            |
|                                   | TDCPP    | 3.94E-13                  | 9.72E+07 | 1.18                     | 0.2    | 6.14          | 5.91E-03            |
| Polyester clothing <sup>2</sup>   | TCEP     | 1.64E-13                  | 3.35E+06 | 1.35                     | 2.2    | 5414          | 2.03E-05            |
|                                   | T CPP    | 6.70E-14                  | 2.89E+06 | 1.25                     | 2.2    | 14202         | 8.31E-06            |
|                                   | TDCPP    | 1.13E-14                  | 1.54E+08 | 1.18                     | 2.2    | 1485          | 1.40E-06            |
| Cotton clothing <sup>2</sup>      | TCEP     | 1.52E-11                  | 1.03E+07 | 1.35                     | 0.8    | 6.91          | 1.43E-02            |
|                                   | T CPP    | 6.24E-12                  | 9.67E+06 | 1.25                     | 0.8    | 16.57         | 5.85E-03            |
|                                   | TDCPP    | 1.05E-12                  | 4.82E+07 | 1.18                     | 0.8    | 18.57         | 9.84E-04            |
| Uniform shirt <sup>2</sup>        | TCEP     | 1.45E-10                  | 2.58E+06 | 1.35                     | 0.8    | 2.89          | 1.36E-01            |
|                                   | T CPP    | 5.92E-11                  | 2.39E+06 | 1.25                     | 0.8    | 7.07          | 5.55E-02            |
|                                   | TDCPP    | 9.96E-12                  | 1.84E+07 | 1.18                     | 0.8    | 5.13          | 9.34E-03            |
| PUF <sup>2</sup>                  | TCEP     | 1.22E-09                  | 5.28E+06 | 1.35                     | 7.1    | 1.49          | 1.45E-02            |
|                                   | T CPP    | 5.01E-10                  | 4.99E+06 | 1.25                     | 7.1    | 3.55          | 5.96E-03            |
|                                   | TDCPP    | 8.43E-11                  | 2.26E+07 | 1.18                     | 7.1    | 4.38          | 1.00E-03            |



|                                      |         |          |          |      |     |        |          |
|--------------------------------------|---------|----------|----------|------|-----|--------|----------|
| Painted Gypsum board <sup>2</sup>    | TCEP    | 2.66E-09 | 5.01E+06 | 1.35 | 1.1 | 0.11   | 1.32E+00 |
|                                      | T CPP   | 1.09E-09 | 4.85E+06 | 1.25 | 1.1 | 0.26   | 5.40E-01 |
|                                      | TDCPP   | 1.83E-10 | 1.17E+07 | 1.18 | 1.1 | 0.60   | 9.07E-02 |
| PUF <sup>2</sup>                     | TCEP    | 2.95E-09 | 3.87E+06 | 1.35 | 8.9 | 1.05   | 2.23E-02 |
|                                      | T CPP   | 1.21E-09 | 3.70E+06 | 1.25 | 8.9 | 2.48   | 9.17E-03 |
|                                      | TDCPP   | 2.03E-10 | 1.23E+07 | 1.18 | 8.9 | 4.19   | 1.54E-03 |
| Carpet-B <sup>2</sup>                | TCEP    | 9.60E-09 | 5.70E+05 | 1.35 | 5.8 | 1.43   | 1.71E-01 |
|                                      | T CPP   | 3.93E-09 | 5.30E+05 | 1.25 | 5.8 | 3.48   | 7.01E-02 |
|                                      | TDCPP   | 6.61E-10 | 3.74E+06 | 1.18 | 5.8 | 2.76   | 1.18E-02 |
| Vinyl flooring-B <sup>2</sup>        | TCEP    | 2.23E-12 | 9.42E+07 | 1.35 | 0.2 | 1.29   | 3.35E-02 |
|                                      | T CPP   | 9.13E-13 | 9.20E+07 | 1.25 | 0.2 | 2.98   | 1.37E-02 |
|                                      | TDCPP   | 1.54E-13 | 1.74E+08 | 1.18 | 0.2 | 8.77   | 2.31E-03 |
| Mattress pad <sup>2</sup>            | TCEP    | 4.70E-10 | 3.14E+05 | 1.35 | 0.8 | 7.33   | 4.41E-01 |
|                                      | T CPP   | 1.92E-10 | 2.72E+05 | 1.25 | 0.8 | 19.15  | 1.80E-01 |
|                                      | TDCPP   | 3.23E-11 | 1.38E+07 | 1.18 | 0.8 | 2.11   | 3.03E-02 |
| PTFE <sup>3</sup>                    | PCB-52  | 1.17E-15 | 6.18E+06 | 1.31 | 0.8 | 112388 | 1.10E-06 |
|                                      | PCB-66  | 1.17E-15 | 2.35E+07 | 1.31 | 0.8 | 144386 | 1.10E-06 |
|                                      | PCB-101 | 5.65E-16 | 3.60E+07 | 1.22 | 0.8 | 37971  | 5.30E-07 |
|                                      | PCB-110 | 5.65E-16 | 6.76E+07 | 1.22 | 0.8 | 47906  | 5.30E-07 |
|                                      | PCB-118 | 5.65E-16 | 1.44E+08 | 1.22 | 0.8 | 25512  | 5.30E-07 |
| PEEK <sup>3</sup>                    | PCB-52  | 1.78E-16 | 2.93E+07 | 1.31 | 2.4 | 11976  | 1.85E-08 |
|                                      | PCB-66  | 1.78E-16 | 1.07E+08 | 1.31 | 2.4 | 600529 | 1.85E-08 |
|                                      | PCB-101 | 8.61E-17 | 1.61E+08 | 1.22 | 2.4 | 164444 | 8.97E-09 |
|                                      | PCB-110 | 8.61E-17 | 2.97E+08 | 1.22 | 2.4 | 210877 | 8.97E-09 |
|                                      | PCB-118 | 8.61E-17 | 6.16E+08 | 1.22 | 2.4 | 114314 | 8.97E-09 |
| Polypropylene sheet <sup>3</sup>     | PCB-52  | 1.33E-10 | 9.14E+06 | 1.31 | 0.8 | 0.86   | 1.25E-01 |
|                                      | PCB-66  | 1.33E-10 | 2.49E+07 | 1.31 | 0.8 | 0.32   | 1.25E-01 |
|                                      | PCB-101 | 6.46E-11 | 3.44E+07 | 1.22 | 0.8 | 0.44   | 6.06E-02 |
|                                      | PCB-110 | 6.46E-11 | 5.52E+07 | 1.22 | 0.8 | 0.27   | 6.06E-02 |
|                                      | PCB-118 | 6.46E-11 | 9.73E+07 | 1.22 | 0.8 | 0.16   | 6.06E-02 |
| HDPE Polyethylene sheet <sup>3</sup> | PCB-52  | 1.34E-10 | 1.28E+07 | 1.31 | 0.8 | 0.61   | 1.26E-01 |
|                                      | PCB-66  | 1.34E-10 | 3.13E+07 | 1.31 | 0.8 | 0.25   | 1.26E-01 |
|                                      | PCB-101 | 6.47E-11 | 4.16E+07 | 1.22 | 0.8 | 0.36   | 6.07E-02 |
|                                      | PCB-110 | 6.47E-11 | 6.34E+07 | 1.22 | 0.8 | 0.24   | 6.07E-02 |
|                                      | PCB-118 | 6.47E-11 | 1.05E+08 | 1.22 | 0.8 | 0.14   | 6.07E-02 |
| LDPE Polyethylene sheet <sup>3</sup> | PCB-52  | 3.18E-10 | 1.66E+07 | 1.31 | 0.8 | 0.20   | 2.98E-01 |
|                                      | PCB-66  | 3.18E-10 | 2.98E+07 | 1.31 | 0.8 | 0.11   | 2.98E-01 |
|                                      | PCB-101 | 1.54E-10 | 3.60E+07 | 1.22 | 0.8 | 0.18   | 1.44E-01 |
|                                      | PCB-110 | 1.54E-10 | 4.75E+07 | 1.22 | 0.8 | 0.13   | 1.44E-01 |
|                                      | PCB-118 | 1.54E-10 | 6.62E+07 | 1.22 | 0.8 | 0.10   | 1.44E-01 |

|                             |         |          |          |      |     |          |          |
|-----------------------------|---------|----------|----------|------|-----|----------|----------|
| Concrete disks <sup>3</sup> | PCB-52  | 1.26E-11 | 1.29E+07 | 1.31 | 7.2 | 57.81    | 1.46E-04 |
|                             | PCB-66  | 1.26E-11 | 3.47E+07 | 1.31 | 7.2 | 21.49    | 1.46E-04 |
|                             | PCB-101 | 6.12E-12 | 4.76E+07 | 1.22 | 7.2 | 30.10    | 7.08E-05 |
|                             | PCB-110 | 6.12E-12 | 7.60E+07 | 1.22 | 7.2 | 18.85    | 7.08E-05 |
|                             | PCB-118 | 6.12E-12 | 1.33E+08 | 1.22 | 7.2 | 10.77    | 7.08E-05 |
| Vinyl flooring <sup>4</sup> | DEHP    | 3.60E-10 | 2.40E+11 | 1.05 | 2.0 | 2.44E-05 | 5.40E-02 |

1. Measured in this study.

2. The values of  $D_m$ ,  $K_{ma}$ ,  $L$  were obtained from ref 5.

3. The values of  $D_m$ ,  $K_{ma}$ ,  $L$  were obtained from ref 6.

4. The values of  $D_m$ ,  $K_{ma}$ ,  $L$  were obtained from ref 7.

5. Calculated using program PARAMS (ref 2) with an air velocity of 0.85 m/s (ref 8) and a characteristic length of 1 m (reasonably assumed).

6. Estimated with a time of 600 h (emission test duration in this study).

Table S6. Relationship between  $y_0/V_p$  and mass fraction in materials for SVOCs.

|                       | Mass fraction | $y_0$ ( $\mu\text{g}/\text{m}^3$ ) | $V_p$ at 25 °C ( $\mu\text{g}/\text{m}^3$ ) <sup>1</sup> | $y_0/V_p$ |
|-----------------------|---------------|------------------------------------|----------------------------------------------------------|-----------|
| DEHP <sup>1</sup>     | 0.13          | 2.3                                | 5.64                                                     | 0.41      |
| DEHP <sup>1</sup>     | 0.001         | 0.02                               | 5.64                                                     | 0.004     |
| DEHP <sup>1</sup>     | 0.07          | 1.54                               | 5.64                                                     | 0.27      |
| DEHP <sup>2</sup>     | 0.05          | 0.77                               | 5.64                                                     | 0.14      |
| DEHP <sup>3</sup>     | 0.06          | 0.9                                | 5.64                                                     | 0.16      |
| DINP <sup>1</sup>     | 0.20          | 0.42                               | 0.52                                                     | 0.81      |
| BBP <sup>1</sup>      | 0.15          | 8.47                               | 12.3                                                     | 0.69      |
| Iso-DEHP <sup>1</sup> | 0.07          | 0.12                               | 0.88                                                     | 0.14      |
| DnBP <sup>1</sup>     | 0.09          | 24.7                               | 464                                                      | 0.053     |
| DnBP <sup>2</sup>     | 0.04          | 36                                 | 464                                                      | 0.078     |
| DnBP <sup>3</sup>     | 0.04          | 25                                 | 464                                                      | 0.054     |
| TCEP <sup>4</sup>     | 0.04          | 5.79                               | 131 <sup>6</sup>                                         | 0.044     |
| TCEP <sup>5</sup>     | 0.04          | 4.33                               | 131 <sup>6</sup>                                         | 0.033     |
| TCPP <sup>4</sup>     | 0.02          | 2.45                               | 185 <sup>6</sup>                                         | 0.013     |
| TCPP <sup>5</sup>     | 0.02          | 1.67                               | 185 <sup>6</sup>                                         | 0.009     |

1. Obtained from ref 9.

2. Obtained from ref 10.

3. Obtained from ref 3.

4. Obtained from the material-air-material (M-A-M) configured microchamber emission test in this study.

5. Obtained from the diffusive sampler test in this study.

6. Obtained from ref 4. The vapor pressure values were converted from Pa to  $\mu\text{g}/\text{m}^3$  using the ideal gas law.

## REFERENCES

1. Liang, Y.; Liu, X.; Allen, M. R. Measuring and modeling surface sorption dynamics of organophosphate flame retardants in chambers. *Chemosphere* **2018**, 193, 754-762.
2. Guo, Z. Program PARAMS Users Guide. U.S. Environmental Protection Agency, Washington, DC, EPA/600/R-05/066 (NTIS PB2006-102000), **2005**.
3. Wu, Y.; Xie, M.; Cox, S. S.; Marr, L. C.; Little, J. C., A simple method to measure the gas-phase SVOC concentration adjacent to a material surface. *Indoor Air* **2016**, 26, 903-912.
4. European Union Risk Assessment Report - TDCP CAS 13674-87-8, May 2008. Tris [2-Chloro-1-(Chloromethyl) Ethyl] Phosphate (TDCP). [https://echa.europa.eu/documents/10162/13630/trd\\_rar\\_ireland\\_tdcp\\_en.pdf](https://echa.europa.eu/documents/10162/13630/trd_rar_ireland_tdcp_en.pdf) (last accessed April 17, **2018**).
5. Liu, X.; Allen, M. R.; Roache, N. F., Characterization of organophosphorus flame retardants' sorption on building materials and consumer products. *Atmos. Environ.* **2016**, 140, 333-341.
6. Liu, X.; Guo, Z.; Roache, N. F., Experimental method development for estimating solid-phase diffusion coefficients and material/air partition coefficients of SVOCs. *Atmos. Environ.* **2014**, 89, 76-84.
7. Xu, Y.; Little, J. C., Predicting emissions of SVOCs from polymeric materials and their interaction with airborne particles. *Environ. Sci. Technol.* **2006**, 40, 456-461.
8. Huang, J. M.; Chen, Q. Y.; Ribot, B.; Rivoalen, H., Modelling contaminant exposure in a single-family house. *Indoor Built Environ.* **2004**, 13, 5-19.
9. Liang, Y.; Xu, Y., Improved method for measuring and characterizing phthalate emissions from building materials and its application to exposure assessment. *Environ. Sci. Technol.* **2014**, 48, 4475-4484.
10. Cao, J.; Zhang, X.; Little, J. C.; Zhang, Y., A SPME-based method for rapidly and accurately measuring the characteristic parameter for DEHP emitted from PVC floorings. *Indoor Air* **2017**, 27, 417-426.
